# Supplementary material for: Structure, phase transition and properties of the one-dimensional antiferromagnet Cu(2,6-dimethylpyrazine)Br2
Source: Royal Society of Chemistry journal article supplement (doi:10.1039/d1ra02318g), 2021-01-01
Supplement: d1ra02318g1.pdf [file d1ra02318g1.pdf]

## Supplementary Information

### Structure, phase transition and properties of the one-dimensional antiferromagnet Cu(2,6-dimethylpyrazine)Br<sub>2</sub>

Fei Ding<sup>1</sup>, Chuanlu Yang<sup>1</sup>, Xiangnan Gong<sup>2</sup>, Hui Zheng<sup>2</sup>, Xiaoyu Zhou<sup>1</sup>, Lingli Li<sup>1</sup>, Lichun Zhang<sup>1</sup>, Dehua Wang<sup>1</sup> and Bingying Pan<sup>\*1</sup>

<sup>1</sup> School of Physics and Optoelectronic Engineering, Ludong University, Yantai, Shandong 264025, China

<sup>2</sup> Analytical and Testing Center, Chongqing University, Chongqing, 401331, China

<sup>3</sup> School of Chemistry and Materials Science, Ludong University, Yantai, Shandong 264025, China

\*Corresponding email: [bypan@ldu.edu.cn](mailto:bypan@ldu.edu.cn)

#### 1. Thermogravimetric analysis (TGA) data

To verify the constitution and purity of **1**, we have performed thermogravimetric Analysis (TGA) was performed by NETZSCH STA 409 PC/PG instrument in N<sub>2</sub> flow, the heating rate is 10 °C/min. The result is shown in Fig. S1. The first step corresponds to the decomposition of 2,6-dimethylpyrazine organic ligand (calculated: 32.62%, found: 34.51%)

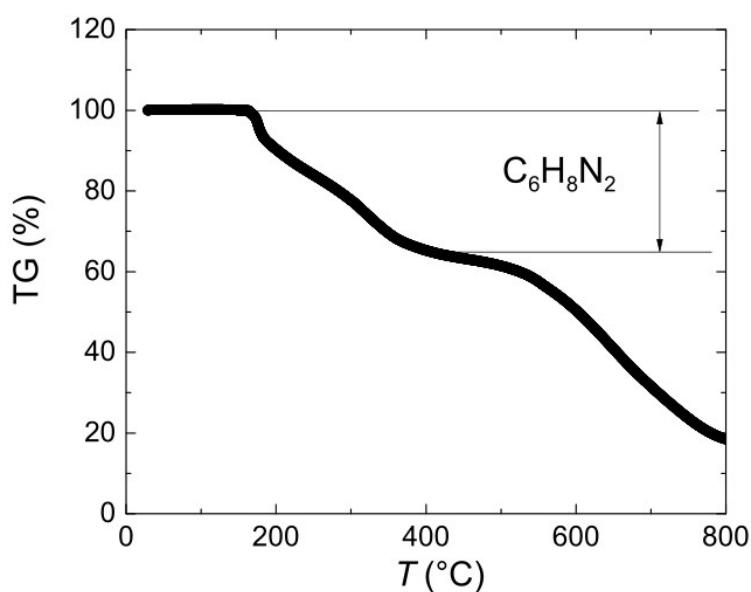

**Figure S1.** TGA data of **1**. The first step corresponds to the decomposition of 2,6-dimethylpyrazine organic ligand.

#### 2. IR and Raman measurements

We performed both infrared (IR) and Raman spectroscopy measurements and the results are presented in Fig. S2. IR spectroscopy was performed using a Magna 550 FT-IR spectrometer (Nicolet Instruments, France) in the range from 400 to 2000 cm<sup>-1</sup>.

Raman spectroscopy was measured by HORIBA LabRAM HR Evolution. The positions of characteristic peaks are listed in Table S1. The spectra are dominated by the vibrational mode of 2,6-dimethylpyrazine molecules. By comparison with the results of density functional theory (DFT) calculations for 2,6-dimethylpyrazine molecules, we assigned the observed peaks to the corresponding vibrations (Table S1).

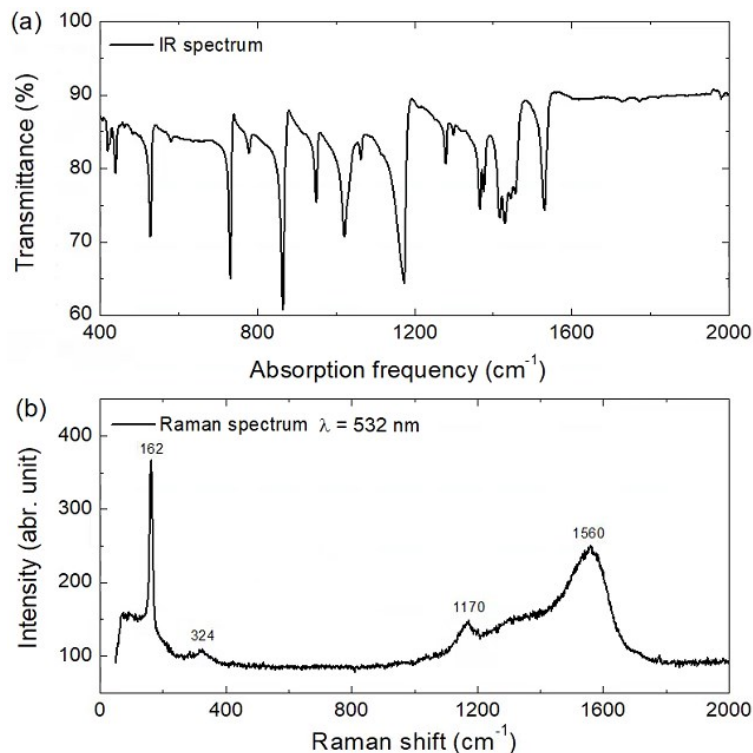

**Figure S2.** (a) IR and (b) Raman spectroscopy of **1**. The incident photon wavelength for Raman measurement is 532 nm. Four characteristic Raman shift peaks appear at 162, 324, 1170, and 1560 cm<sup>-1</sup>.

**Table S1** Observed and calculated frequencies (cm<sup>-1</sup>).

| IR   | Raman | Assignments*                       |
|------|-------|------------------------------------|
|      | 162   | Ring torsion                       |
|      | 324   | Ring torsion                       |
| 419  |       | C-CH <sub>3</sub> bending          |
| 439  |       | Ring torsion                       |
| 528  |       | C-CH <sub>3</sub> wagging          |
| 731  |       | C-CH <sub>3</sub> wagging          |
| 865  |       | C-H wagging                        |
| 950  |       | C-H wagging                        |
| 1021 |       | CH <sub>3</sub> rocking            |
| 1173 | 1170  | C-H bending                        |
| 1280 |       | Ring stretching                    |
| 1366 |       | CH <sub>3</sub> bending symmetric  |
| 1430 |       | CH <sub>3</sub> bending asymmetric |
| 1530 |       | Ring stretching                    |

---

\* From the DFT calculations by A. Pawlukoć et al. Journal of Molecular Structure, 2008, **892**, 261–267
